# Supplementary material for: Anti-CD40 antibody KPL-404 inhibits T cell-mediated activation of B cells from healthy donors and autoimmune patients
Source: PubMed Central journal article supplement (PMC7789801; doi:10.1186/s13075-020-02372-z), 2021-01-06
Supplement: 13075_2020_2372_MOESM2_ESM.pdf [file 13075_2020_2372_MOESM2_ESM.pdf]

**Fig.S1**

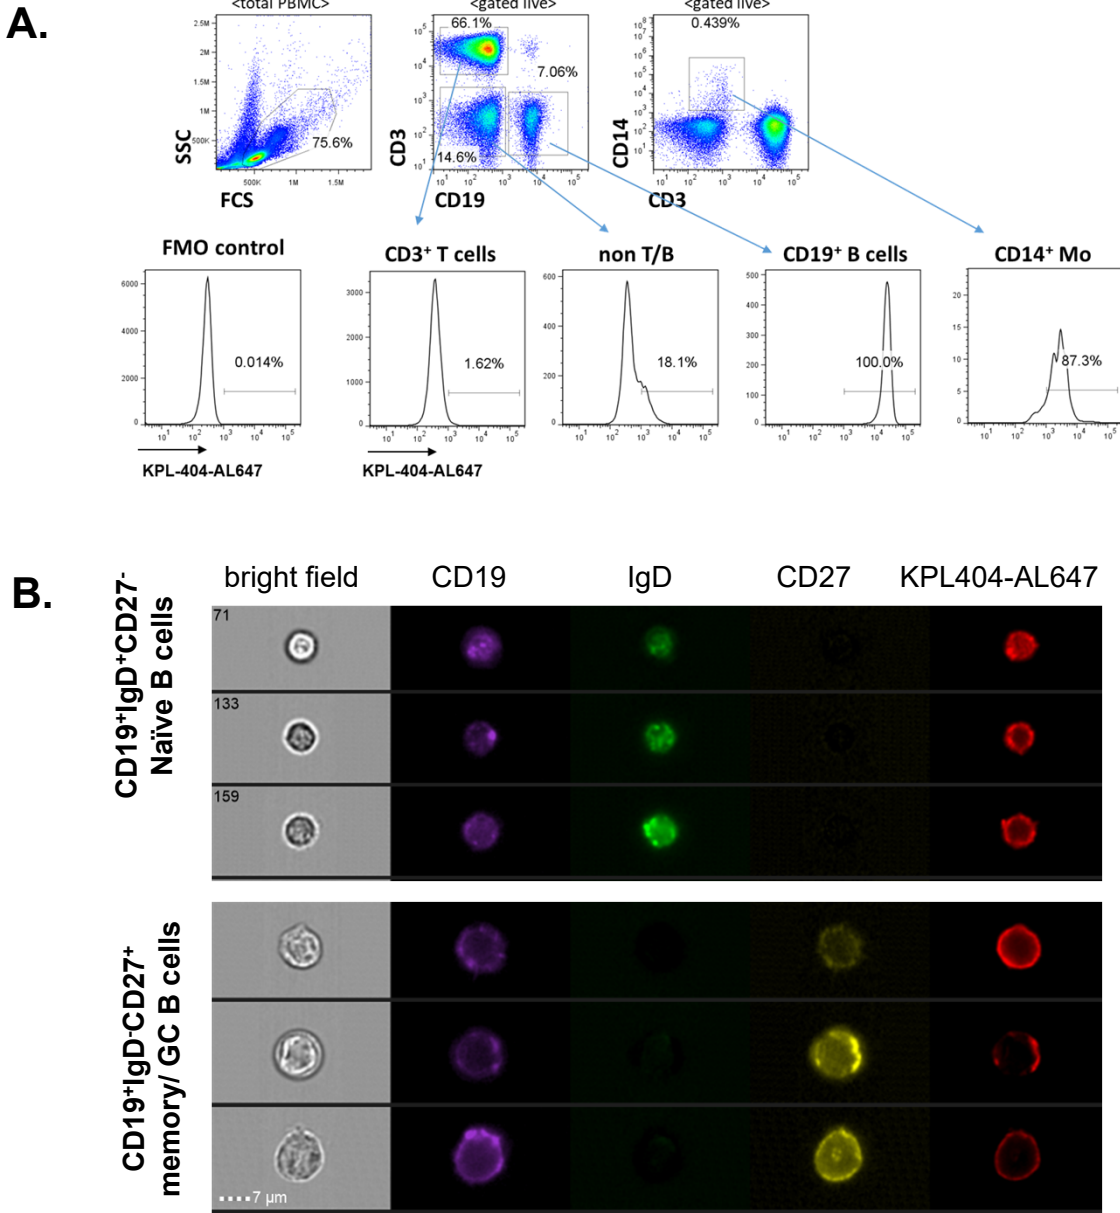

**Fig.S1. (A) KPL-404 binding to PBMCs.** PBMCs were stained with cell lineage markers and AL647-labeled KPL-404 Ab. Histograms show the percentage KPL-404-AL647<sup>+</sup> cells within different cell subsets, including CD3<sup>+</sup> (T cells), CD19-CD3<sup>-</sup> (non T/B), CD19<sup>+</sup> (B cells), and CD14<sup>+</sup> monocytes (Mo). Representative data from one HD. **B) KPL-404 binding to tonsillar B cells.** Tonsillar cells were stained with B cell markers CD19, IgD, CD27, and Alexa-647(AL647)-labeled KPL-404 Ab. Representative imaging flow cytometry data showing KPL-404-AL647 surface staining of IgD<sup>+</sup>CD27<sup>-</sup> (naïve B) and IgD<sup>+</sup>CD27<sup>+</sup> (memory and GC B cells). Data are representative of two experiments, using cells from different donors.

# Fig.S2

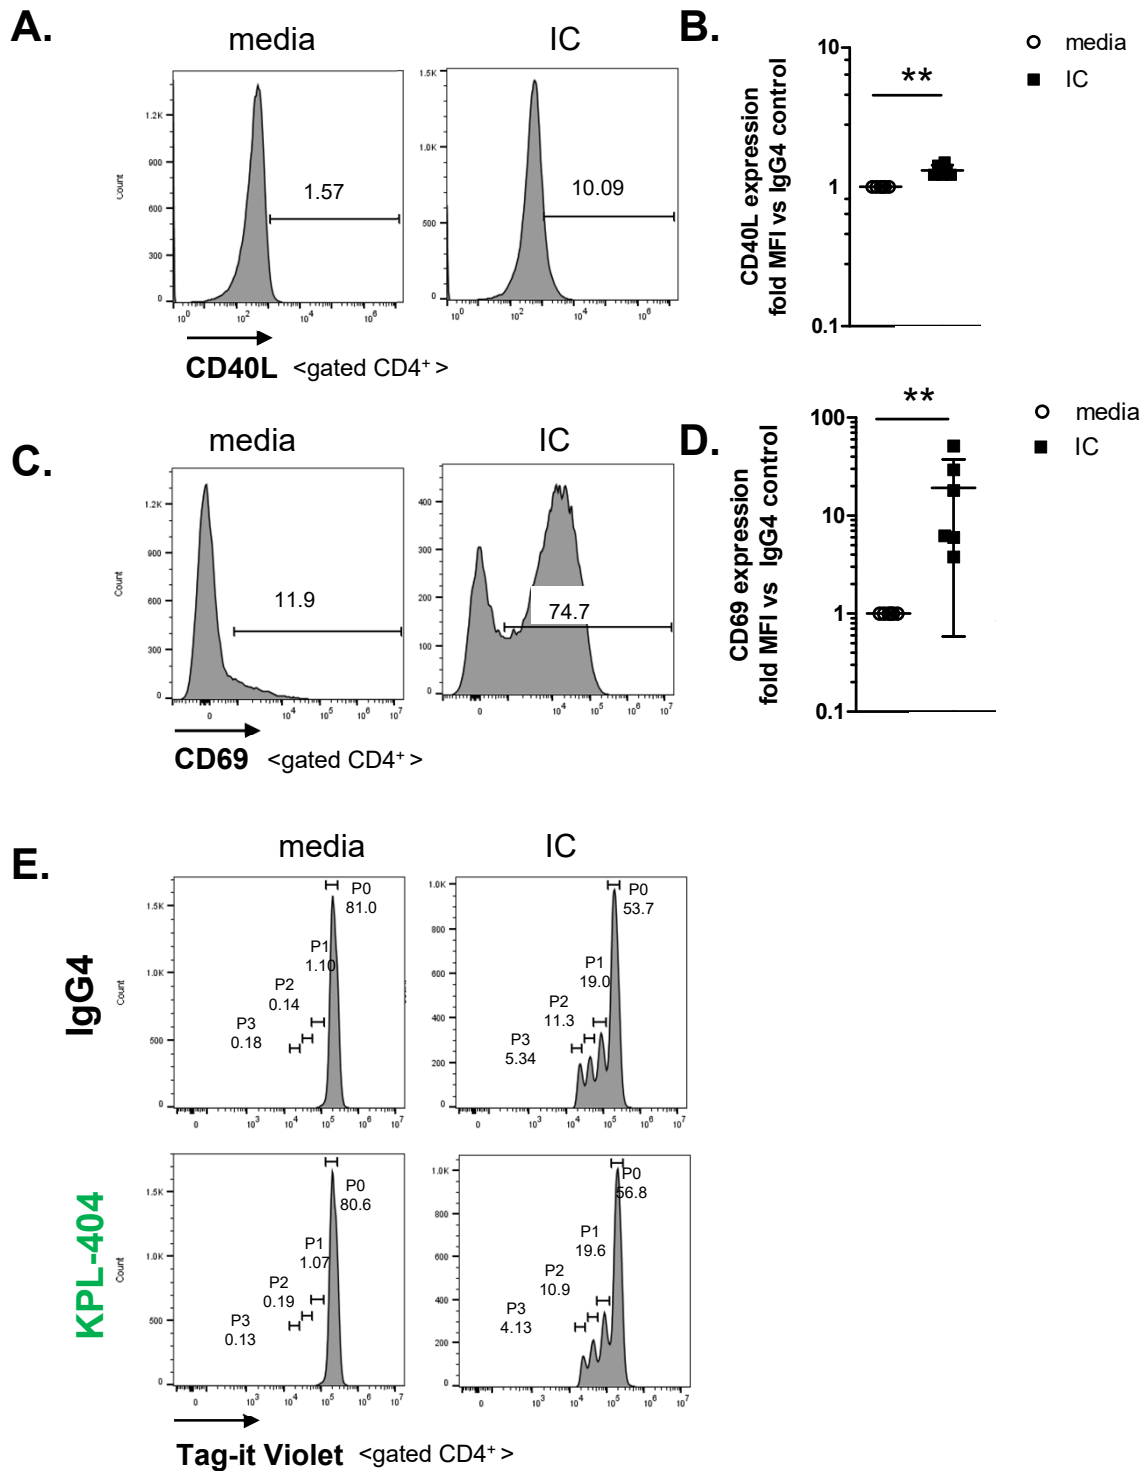

**Fig.S2. T cell activation and proliferation in response to CD3/CD28 crosslinking reagent immunocult (IC).** (A-D) PBMCs were left untreated (media control), or stimulated with anti-CD3/CD28 cross-linking reagent Immunocult (IC) for 16-18 hours. Representative flow analysis showing the expression of CD40L (A) or CD69 (C) on gated live CD4<sup>+</sup> T cell. Cumulative data from six independent experiments, showing upregulation of the expression of CD40L (B) or CD69 (D) in response to IC stimulation. \*\*p < 0.01, determined by unpaired Student's *t* test. (E) PBMCs were labeled with a cell proliferation tracker dye (Tag-it Violet) and cultured for 5 days in the presence of IgG4 isotype control Ab, or KPL-404. Representative flow plots showing increase in T cell proliferation in response to Immunocult (IC) stimulation. Representative data of three independent experiments.

## Fig.S3

HD

| Treatment                         | CD69 | CD86 |
|-----------------------------------|------|------|
| IgG4+media vs IgG4+IC             | *    | **   |
| IgG4+media vs KPL-404+media       | ns   | ns   |
| IgG4+media vs G28-5+media         | *    | ns   |
| IgG4+IC vs KPL-404+IC             | *    | *    |
| IgG4+IC vs G28-5+IC               | **   | ns   |
| IgG4+media vs IgG4+anti-IgM       | *    | *    |
| KPL-404+media vs KPL-404+anti-IgM | *    | *    |
| G28-5+media vs G28-5+anti-IgM     | *    | ns   |
| IgG4+IgM vs KPL-404 + anti-IgM    | ns   | ns   |
| IgG4+IgM vs G28-5+ anti-IgM       | ns   | ns   |

**Figure S3. Changes in the expression of CD69 and CD86 in healthy donor (HD) PBMCs.** Complete statistical analysis of the effect of KPL-404 and G28-5 on B-cells using one-way ANOVA on log transformed data with matched mixed-effects modeling for multiple comparisons tests of significance between different conditions. \*p<0.05, \*\*p<0.005.

**Fig.S4**

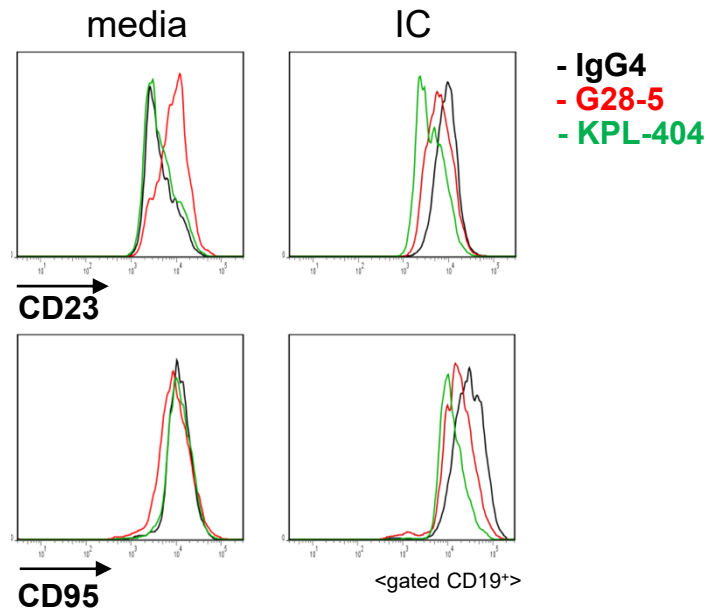

**Fig.S4 Effects of KPL-404 and G28-5 on CD23 and CD95 expression on B cells.** HD PBMCs were cultured in the presence of 10 $\mu$ g/ml IgG4 isotype control or anti-CD40 Abs KPL-404 or G28-5. Cells were left unstimulated (medium control), or stimulated with CD3/CD28 cross linker IC (18 hours in culture). Flow cytometry data, showing the levels of expression of CD23 and CD95 on gated CD19<sup>+</sup> B cells in each condition. Data is representative of two independent experiments.

**Fig.S5**

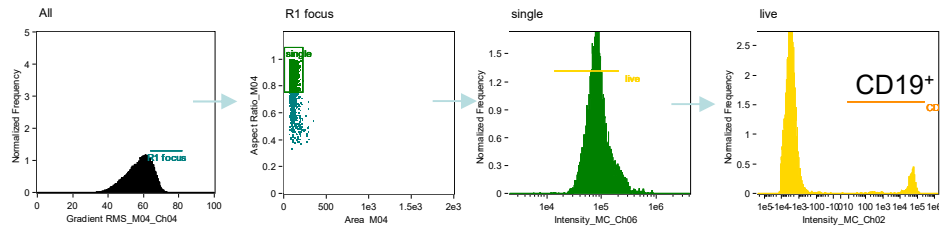

**Fig.S5. Assessment of KPL-404 binding and internalization by imaging flow cytometry – gating strategy.** 2-5 million PBMCs were stained with anti-CD19-AlexaFluor (AL)488, anti-CD40 Abs KPL404-AL647 and G28-5-AL647, or, anti-CD22-AL647. Cells were either kept on ice, or incubated at 37°C for 1h, fixed in 1% formalin, and analyzed. Representative gating strategy used for the identification of CD19<sup>+</sup> B cells; 400-500 B cell images were further analyzed for anti-CD40 Ab binding and internalization (as shown in Fig.5).

Fig.S6.

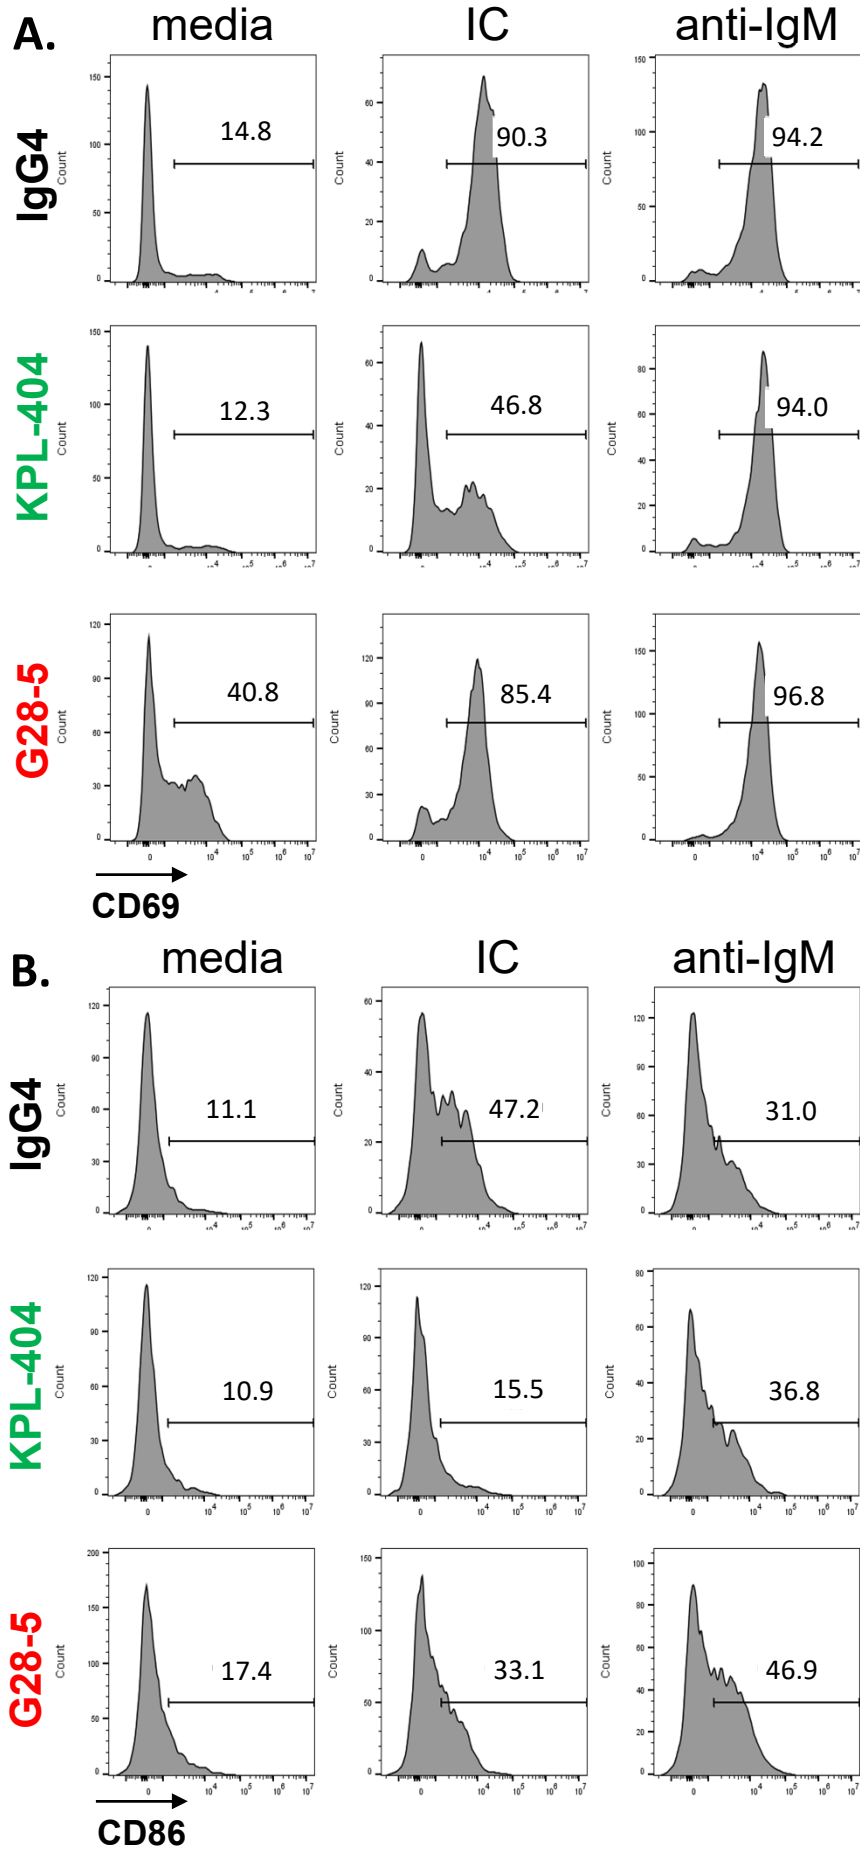

## C. Sjs

| Treatment                       | CD69 | CD86 |
|---------------------------------|------|------|
| IgG4+media vs IgG4+IC           | *    | **   |
| IgG4+media vs KPL-404 +media    | ns   | ns   |
| IgG4+media vs G28-5+media       | ns   | ns   |
| IgG4+IC vs KPL-404+IC           | *    | ns   |
| IgG4+IC vs G28-5+IC             | ns   | ns   |
| IgG4+media vs IgG4+anti-IgM     | *    | ns   |
| 2C10+media vs KPL-404+anti-IgM  | *    | ns   |
| KPL-404+media vs G28-5+anti-IgM | ns   | ns   |
| IgG4+IgM vs KPL-404 + anti-IgM  | ns   | ns   |
| IgG4+IgM vs G28-5+ anti-IgM     | ns   | ***  |

## SLE

| Treatment                         | CD69 | CD86 |
|-----------------------------------|------|------|
| IgG4+media vs IgG4+IC             | ***  | ***  |
| IgG4+media vs KPL-404+media       | ns   | ns   |
| IgG4+media vs G28-5+media         | **   | **   |
| IgG4+IC vs KPL-404+IC             | **   | ***  |
| IgG4+IC vs G28-5+IC               | ns   | ns   |
| IgG4+media vs IgG4+anti-IgM       | ***  | *    |
| KPL-404+media vs KPL-404+anti-IgM | ***  | **   |
| G28-5+media vs G28-5+anti-IgM     | ***  | ns   |
| IgG4+IgM vs KPL-404+anti-IgM      | ns   | ns   |
| IgG4+IgM vs G28-5+anti-IgM        | ns   | **   |

**Fig.S6. Effects of KPL-404 on B cell activation in autoimmune patients assessed by the expression of the activation markers CD69 and CD86.** PBMCs were cultured in the presence of 10µg/ml IgG4 isotype control or anti-CD40 Abs KPL-404 or G28-5 (16-18 hours of cell culture). Cells were left unstimulated (media control), or stimulated with CD3/CD28 cross linker IC, or F(ab')<sub>2</sub> goat anti-human IgM (anti-IgM) and B cell activation was assessed by the expression of the activation markers CD69 and CD86 on gated live CD19<sup>+</sup> B cells. **(A)** Representative data from one individual SLE patient, showing the expression of CD69; gates depict the frequencies of CD69<sup>+</sup> cells. **(B)** Representative data from one individual SLE patient, showing the expression of CD86; gates depict the frequencies of CD86<sup>+</sup> cells. **(C) Changes in the expression of CD69 and CD86 in Sjs and SLE PBMC.** Complete statistical analysis of the effect of KPL-404 and G28-5 on B-cells using one-way ANOVA on log transformed data with matched mixed-effects modeling for multiple comparisons tests of significance between different conditions. \*p<0.05, \*\*p<0.005, and \*\*\*p<0.001.

Fig.S7

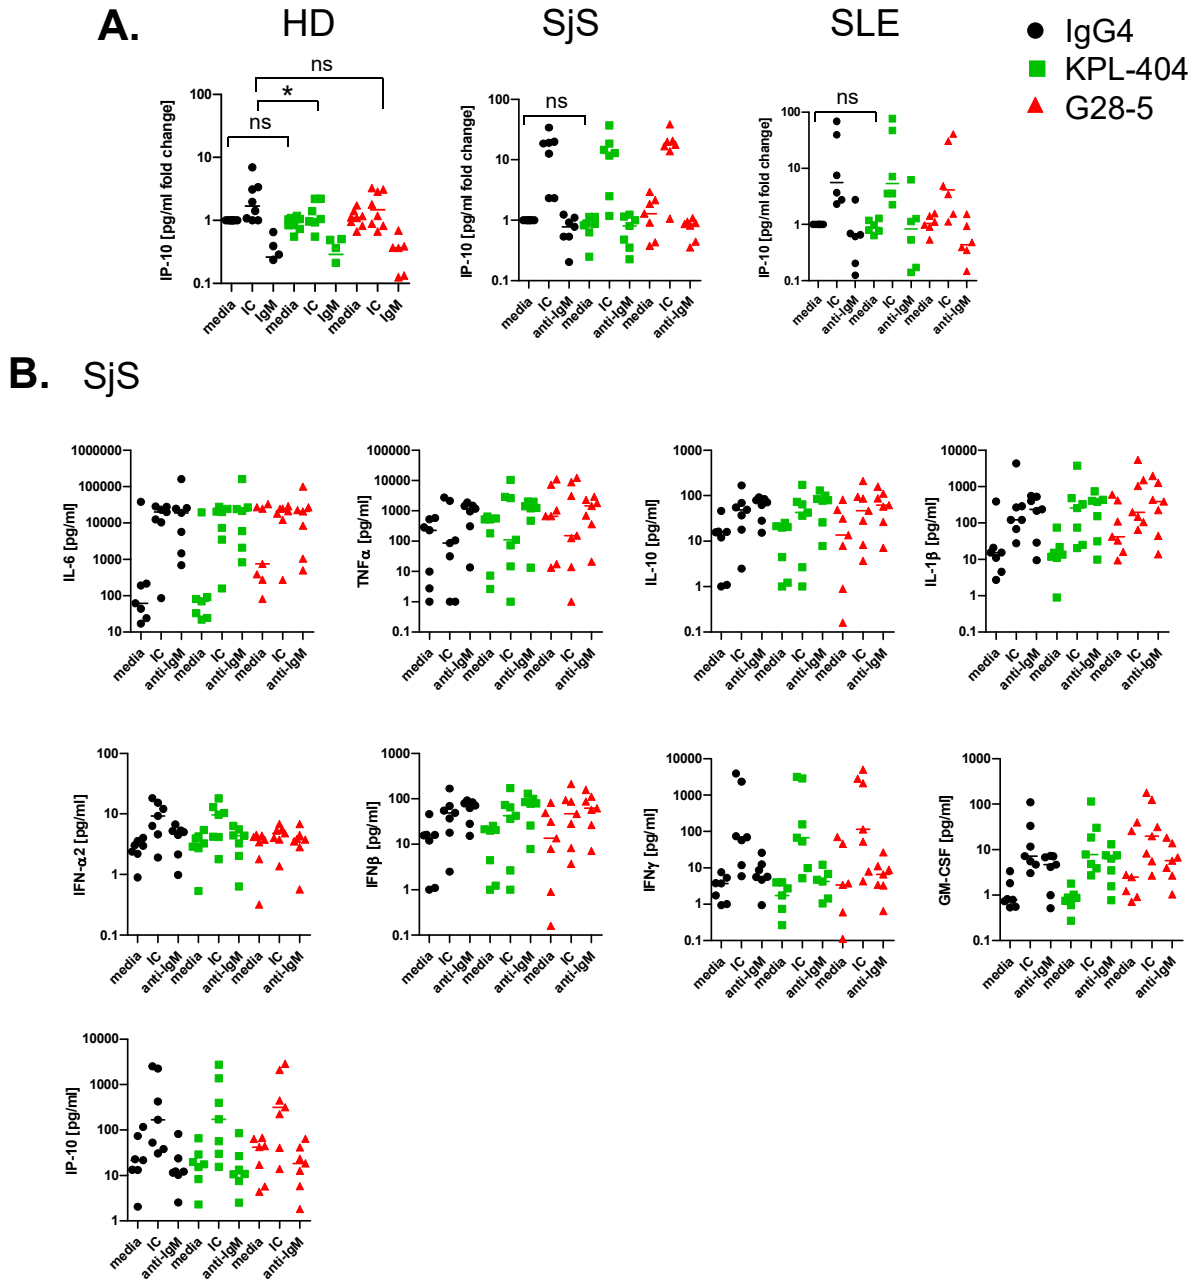

**Fig.S7 Analysis of cytokine production in cell cultures (additional data).** (A) Effects of KPL-404 and G28-5 on IP-10 production in PBMCs cultures from HD, Sjs and SLE patients. The data for each sample were normalized against media controls and is expressed as a fold-change. Statistical analysis were performed using one-way Friedman multiple comparisons test and one-way ANOVA mixed effects analysis (for HD due to missing values); \*p < 0.05. (B) Cytokine production in Sjs cell cultures presented as pg/ml.
